# Supplementary material
Source: publisher figshare collection journal article supplement (https://tandf.figshare.com/articles/dataset/_/9192611)
Supplement: Supplementary file 1 [file 1]

Archive with 2 entries (2 files):
- tbbb_a_1649978_sm6916.mp4
- tbbb_a_1649978_sm6915.pdf
