# Supplementary material
Source: publisher figshare collection journal article supplement (https://tandf.figshare.com/articles/dataset/_/9192611)
Supplement: Supplementary file 1 [file 1 › tbbb_a_1649978_sm6915.pdf]

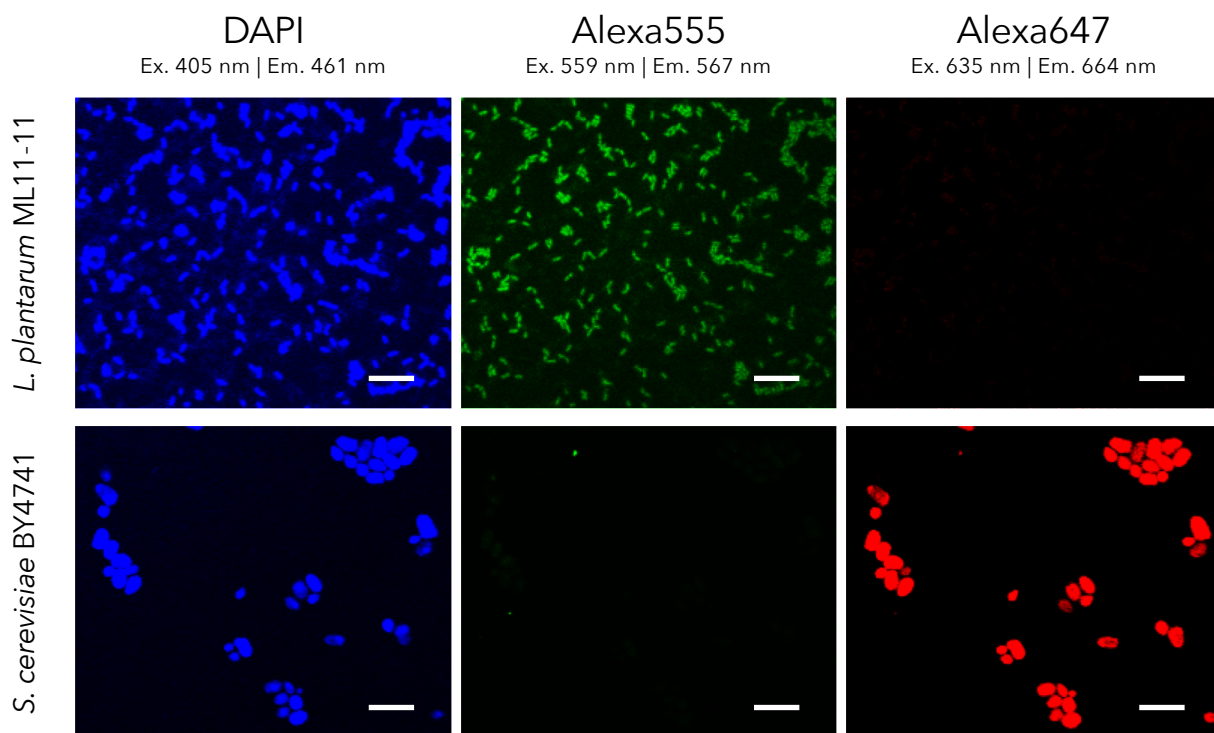

**Supplemental Fig. S1 CLSM images of *L. plantarum* ML11-11 and *S. cerevisiae* BY4741 planktonic cells cultured individually. Scale bars represent 10  $\mu$ m.**

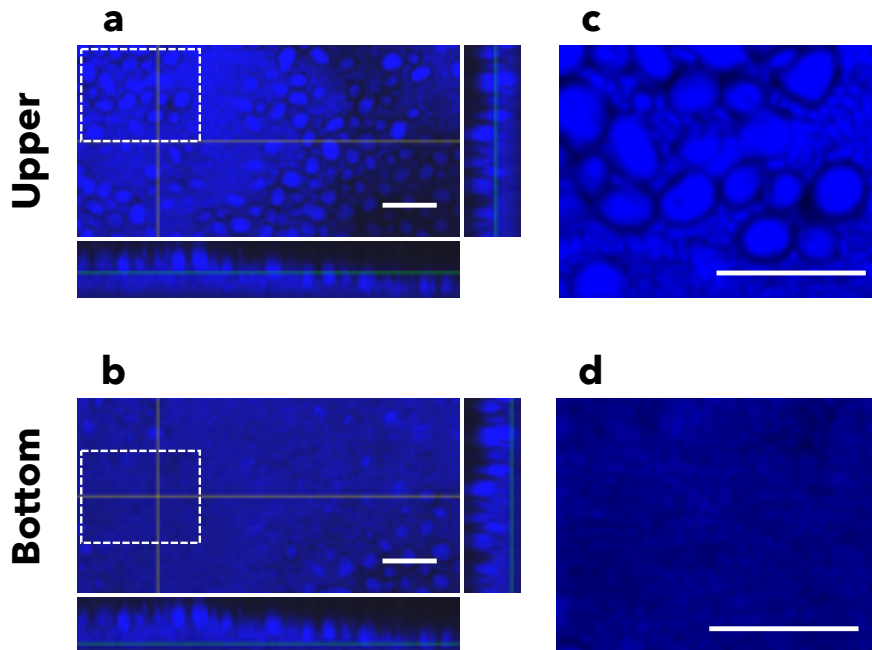

**Supplemental Fig. S2 DAPI images of the mixed-species biofilm formed by *L. plantarum* ML11-11 and *S. cerevisiae* BY4741.** Each image represents the bottom (b,  $Z=1.5\ \mu\text{m}$ ) and the upper parts (a,  $Z=4.5\ \mu\text{m}$ ) of the biofilm. (c) and (d) represent enlarged views of the area enclosed by squares in (a) and (b), respectively. Scale bars represent  $10\ \mu\text{m}$ .

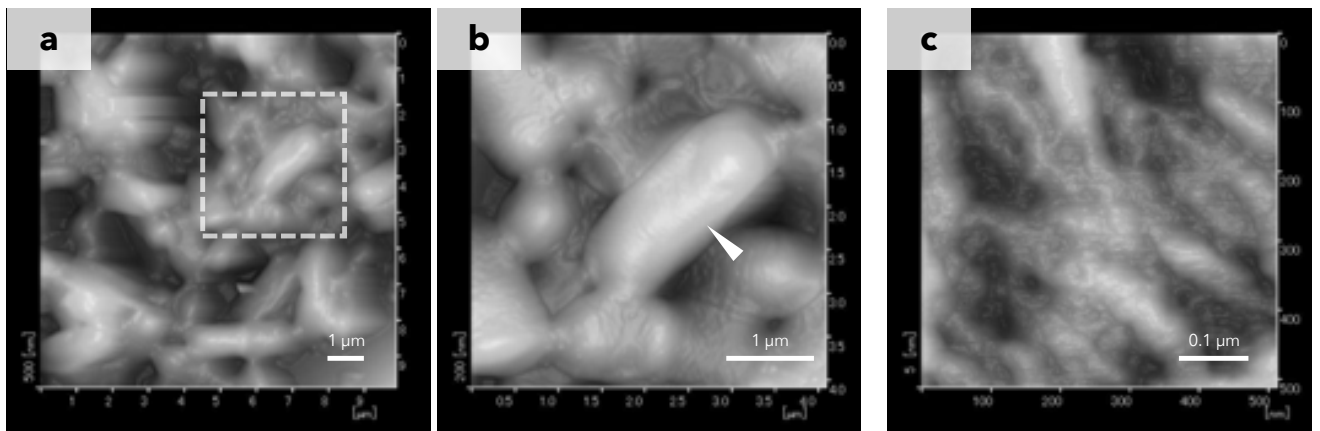

**Supplemental Fig. S3 AFM images of the biofilm formed by *L. plantarum* ML11-11 single culture.** The high magnification image of the area within the square in (a) is displayed in (b). The surface of the cell pointed by triangle in (b) is shown in (c).
